# Supplementary material for: Free convection channel flow of couple stress casson fluid: A fractional model using Fourier’s and Fick’s laws
Source: Frontiers journal article supplement (doi:10.3389/fphy.2023.1031042), 2023-02-17
Supplement: Data_Sheet_1.pdf [file Data_Sheet_1.pdf]

## Appendix

This article studied the unsteady incompressible flow of a couple stress Casson fluid through a porous material in a channel. The direction of the flow is considered along the x-axis. The distance between the plates is  $d$ . The length of both the plates is infinite. The fluid and both plates are at rest at time  $t_1 = 0$ , with ambient temperature and concentration  $T_1$  and  $C_1$ , respectively. After time  $t_1 = 0^+$ , the left plate at ( $y_1 = 0$ ) begins to oscillate with characteristic velocity  $U$  and frequency  $\omega$ , while the right plate at  $y = d$  stays at rest. The temperature and concentration of the left plate are also raised to  $T_1 + (T_d - T_1)At_1$  and  $C_1 + (C_d - C_1)At_1$ , respectively as displayed in Fig. 1.

In this appendix, the unsteady incompressible flow of couple stress Casson fluid is considered.

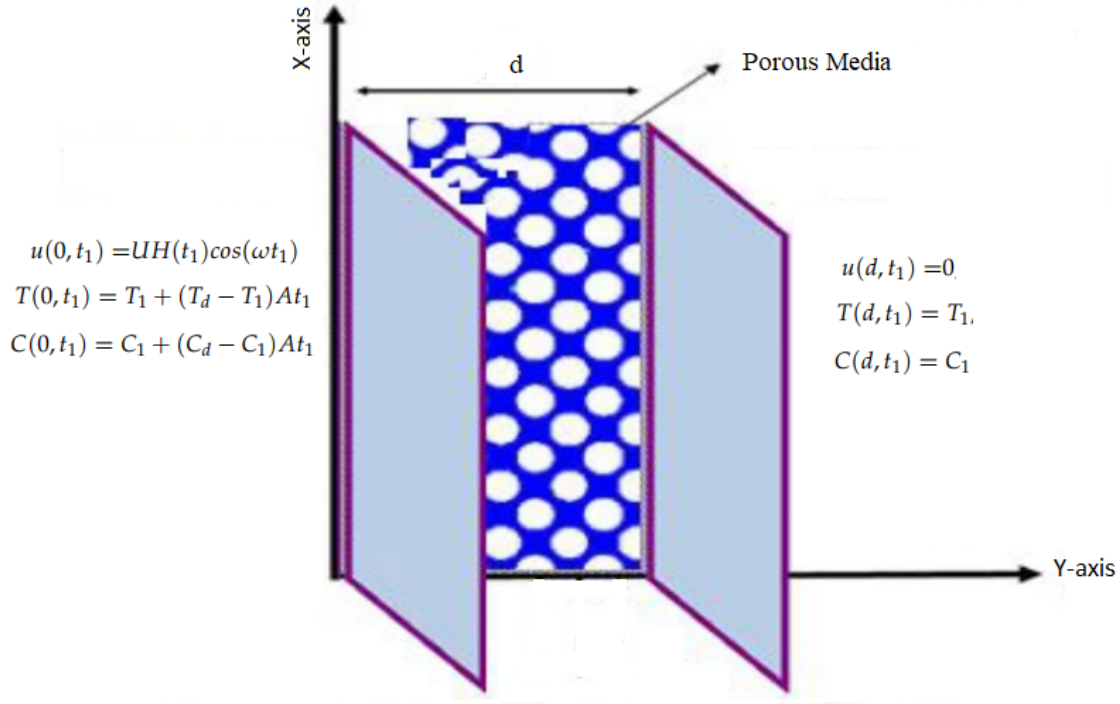

Figure 1: Geometry of the problem.

The governing equations for unsteady couple stress Casson fluid flow between infinite parallel plates are given by:

The equation of continuity is defined as:

$$\frac{\partial \rho}{\partial t} + \vec{\nabla} \cdot (\rho \vec{V}) = 0, \quad (1)$$

Here "del" or "nabla"  $\nabla$  is a vector operator,  $t$ ,  $\rho$  and  $\vec{V}$  shows time variable, density, and the velocity vector field receptively.

The velocity vector field is defined as  $\vec{V} = (u, v, w)$  with  $u$ ,  $v$  and  $w$  are the velocity components along the axis i.e  $x$ ,  $y$  and  $z$  axis.

For constant density, the flow becomes incompressible flow. Then Equation of continuity reduces to:

$$\vec{\nabla} \cdot \vec{V} = \frac{\partial u}{\partial x} + \frac{\partial v}{\partial y} + \frac{\partial w}{\partial z} = 0. \quad (2)$$

In the present work, one dimensional and unidirectional flow is considered. Thus, the velocity field  $\vec{V}$  can be expressed as [? ]:

$$\vec{V} = (u(y, t), 0, 0). \quad (3)$$

For our flow, the velocity, temperature, and concentration profiles are expressed as:

$$\vec{V} = (u(y, t), 0, 0), \quad T = (T(y, t), 0, 0), \quad C = (C(y, t), 0, 0). \quad (4)$$

for incompressible Casson is stated as:

$$\tau_{ij} = \begin{cases} 2 \left( \mu_p + \frac{p_y}{\sqrt{2\pi}} \right) \mathbf{e}_{ij}, & \pi > \pi_b \\ 2 \left( \mu_p + \frac{p_y}{\sqrt{2\pi}} \right) \mathbf{e}_{ij}, & \pi \leq \pi_b \end{cases} \quad (5)$$

where,  $\tau_{ij}$  is the  $(i, j)^{th}$  components of the stress tensor,  $p_y$  is yield stress of the fluid,  $\mu_p$  is the dynamic viscosity for plastic non-Newtonian fluid,  $\mathbf{e}_{ij}$  is the  $(i, j)^{th}$  components of the deformation rate for non-Newtonian fluid,  $\pi_b$  is the critical value for deformation rate,  $\pi$  is the multiplication of deformation rate with itself, and  $\pi = \mathbf{e}_{ij} \mathbf{e}_{ij}$ .

The governing equation for incompressible flow of couple stress fluid is given by:

$$\rho \frac{D\vec{V}}{Dt} = \text{div } \tilde{\mathbf{T}} - \eta \vec{\nabla}^4 \vec{V} + \rho \tilde{\mathbf{f}}. \quad (6)$$

Here  $\rho \tilde{\mathbf{f}}$  are the body forces. The mathematical expression for body forces can be expressed as:

$$\rho \tilde{\mathbf{f}} = \vec{J} \times \vec{B} + \vec{R} + \rho \vec{g}, \quad (7)$$

As no magnetic field is considered, therefor:

$$\vec{J} \times \vec{B} = 0. \quad (8)$$

Substituting equation (8) in equation (7), we obtain:

$$\rho \tilde{\mathbf{f}} = \vec{R} + \rho \vec{g}, \quad (9)$$

---

The Cauchy stress tensor for incompressible non-Newtonian Casson fluid is:

$$\mathbf{T} = -P\mathbf{I} + \mu D. \quad (10)$$

where,  $I$ ,  $P$ ,  $\mu$  and  $D$  is identity tensor, and rate of strain tensor respectively.

The rate of strain tensor is mathematically define as:

$$D = \frac{1}{2}(J + J^t), \quad (11)$$

where, the velocity gradient  $J$  and its transpose  $J^t$  is give below:

$$J = \begin{pmatrix} \frac{\partial u}{\partial x} & \frac{\partial u}{\partial y} & \frac{\partial u}{\partial z} \\ \frac{\partial v}{\partial x} & \frac{\partial v}{\partial y} & \frac{\partial v}{\partial z} \\ \frac{\partial w}{\partial x} & \frac{\partial w}{\partial y} & \frac{\partial w}{\partial z} \end{pmatrix}, \quad J^t = \begin{pmatrix} \frac{\partial u}{\partial x} & \frac{\partial v}{\partial x} & \frac{\partial w}{\partial x} \\ \frac{\partial u}{\partial y} & \frac{\partial v}{\partial y} & \frac{\partial w}{\partial y} \\ \frac{\partial u}{\partial z} & \frac{\partial v}{\partial z} & \frac{\partial w}{\partial z} \end{pmatrix}. \quad (12)$$

For velocity field defined in equation (3), the equation (11) can be written as:

$$J = \begin{pmatrix} 0 & \frac{\partial u}{\partial y} & 0 \\ 0 & 0 & 0 \\ 0 & 0 & 0 \end{pmatrix}, \quad J^t = \begin{pmatrix} 0 & 0 & 0 \\ \frac{\partial u}{\partial y} & 0 & 0 \\ 0 & 0 & 0 \end{pmatrix}. \quad (13)$$

Substituting equation (13) in equation (11), we have:

$$D = \frac{1}{2} \begin{pmatrix} 0 & \frac{\partial u}{\partial y} & 0 \\ \frac{\partial u}{\partial y} & 0 & 0 \\ 0 & 0 & 0 \end{pmatrix}. \quad (14)$$

Also the identity tensor in matrix notation is given by:

$$\mathbf{I} = \begin{pmatrix} 1 & 0 & 0 \\ 0 & 1 & 0 \\ 0 & 0 & 1 \end{pmatrix}, \quad \text{then} \quad p\mathbf{I} = \begin{pmatrix} p & 0 & 0 \\ 0 & p & 0 \\ 0 & 0 & p \end{pmatrix}. \quad (15)$$

Now, substituting equations (14) and (15) in equation (10), we have:

$$\mathbf{T} = \begin{pmatrix} -p & \frac{\mu}{2} \frac{\partial u}{\partial y} & 0 \\ \frac{\mu}{2} \frac{\partial u}{\partial y} & -p & 0 \\ 0 & 0 & -p \end{pmatrix}. \quad (16)$$

The divergence of Cauchy stress tensor give in equation (16) is stated as:

$$\vec{\nabla} \cdot \mathbf{T} = \begin{pmatrix} -\frac{\partial p}{\partial x} + \frac{\mu}{2} \frac{\partial^2 u}{\partial y^2} \\ -\frac{\partial p}{\partial y} \\ -\frac{\partial p}{\partial z} \end{pmatrix}. \quad (17)$$

As the flow is in x direction, therefore  $\frac{\partial p}{\partial y}$  and  $\frac{\partial p}{\partial y}$  both are zero. The equation (17) reduce to:

$$\vec{\nabla} \cdot \mathbf{T} = \left( -\frac{\partial p}{\partial x} + \frac{\mu}{2} \frac{\partial^2 u}{\partial y^2} \right) i. \quad (18)$$

The pressure is given by:

$$p = p_d + p_h. \quad (19)$$

Here,  $p_d$  and  $p_h$  indicates dynamic and hydrostatic pressures respectively. As in free convection, the fluid flow is due to only hydrostatic pressure. Thus, for constant density, we have:

$$\frac{\partial p}{\partial x} = \frac{\partial p_d}{\partial x} = -\rho_\infty g, \quad (20)$$

where  $\rho_\infty$  is the ambient density of the fluid.

Substituting equation (20) into equation (18), we have:

$$\vec{\nabla} \cdot \mathbf{T} = \left( \rho_\infty g + \frac{\mu}{2} \frac{\partial^2 u}{\partial y^2} \right) i. \quad (21)$$

Incorporating equations (9) and ((21)) into equation (6) and using the velocity profile define in equation (3); we have:

$$\rho \frac{\partial u}{\partial t} = \frac{\mu}{2} \frac{\partial^2 u}{\partial y^2} + \rho_\infty g - \eta \frac{\partial^4 u}{\partial y^4} + \vec{R} + \rho \vec{g}. \quad (22)$$

Considering equation (5) for Casson fluid, the momentum equation for the flow ca be written as:

$$\rho \frac{\partial u}{\partial t} = \left( \mu_p + \frac{p_y}{\sqrt{2\pi}} \right) \frac{\partial^2 u}{\partial y^2} + \rho_\infty g - \eta \frac{\partial^4 u}{\partial y^4} + \vec{R} + \rho \vec{g}. \quad (23)$$

Equation (23) can be written as:

$$\rho \frac{\partial u}{\partial t} = \mu_p \left( 1 + \frac{1}{\beta} \right) \frac{\partial^2 u}{\partial y^2} + \rho_\infty g - \eta \frac{\partial^4 u}{\partial y^4} + \vec{R} + \rho \vec{g}, \quad (24)$$

here  $\beta = \frac{\mu_p \sqrt{2\pi}}{p_y}$  is the Casson parameter for the fluid.

The mathematical form of Darcy's resistance for Casson fluid is  $R = \mu_p \left( 1 + \frac{1}{\beta} \right) \frac{\phi}{k_1}$ . In addition, the gravitational acceleration is to the flow of fluid. Therefor equation (24) can be written as:

$$\rho \frac{\partial u}{\partial t} = \mu_p \left( 1 + \frac{1}{\beta} \right) \frac{\partial^2 u}{\partial y^2} - \eta \frac{\partial^4 u}{\partial y^4} + \mu_p \left( 1 + \frac{1}{\beta} \right) \frac{\phi}{k_1} u + \vec{g}(\rho_\infty - \rho). \quad (25)$$

Equation (25) can be written in more simple form as:

$$\rho \frac{\partial u}{\partial t} = \mu \left( 1 + \frac{1}{\beta} \right) \frac{\partial^2 u}{\partial y^2} - \eta \frac{\partial^4 u}{\partial y^4} + \mu \left( 1 + \frac{1}{\beta} \right) \frac{\phi}{k_1} u + \vec{g}(\rho_\infty - \rho). \quad (26)$$

Joseph Valentin Boussinesq (1842 – 1929) developed the Boussinesq approximation. This approximation states that "Variation in density is only important in buoyancy term i.e  $\rho g$  and in the rest

---

of equation it can be ignored".

For pure substance (materials free of impurities), the density  $\rho$  can be expressed as:

$$\rho = \rho(p, T, C). \quad (27)$$

Where  $p$ ,  $T$ , and  $C$  indicates the pressure, temperature and concentration respectively.

Taking total differential of equation (27); we have:

$$d\rho = \frac{\partial \rho}{\partial p} dp + \frac{\partial \rho}{\partial T} dT + \frac{\partial \rho}{\partial C} dC. \quad (28)$$

Which can be expressed as:

$$d\rho = K_T \rho dp - \beta_T \rho dT + K_C \rho dC - \beta_C \rho dC, \quad (29)$$

where,  $K_T$  and  $K_C$  indicates temperature and concentration compressibility with uniform temperature and concentration respectively.

The expression for thermal coefficient  $\beta_T$  at constant temperature are given by:

$$K_T = \frac{1}{\rho} \left( \frac{\partial \rho}{\partial p} \right) \approx \frac{1}{\rho} \left( \frac{\Delta \rho}{\Delta p} \right). \quad (30)$$

The above equation can be written as:

$$\Delta \rho = K_T \rho \Delta p. \quad (31)$$

Similarly;

$$\beta_T = -\frac{1}{\rho} \left( \frac{\partial \rho}{\partial T} \right) \approx -\frac{1}{\rho} \left( \frac{\Delta \rho}{\Delta T} \right), \quad (32)$$

The above equation can be written as:

$$\Delta \rho = -\beta_T \rho \Delta T \quad (33)$$

The concentration expansion  $\beta_C$  at constant temperature is:

$$K_C = \frac{1}{\rho} \left( \frac{\partial \rho}{\partial C} \right) \approx \frac{1}{\rho} \left( \frac{\Delta \rho}{\Delta C} \right). \quad (34)$$

The above equation can be written as:

$$\Delta \rho = K_C \rho \Delta C. \quad (35)$$

Similarly;

$$\beta_C = -\frac{1}{\rho} \left( \frac{\partial \rho}{\partial C} \right) \approx -\frac{1}{\rho} \left( \frac{\Delta \rho}{\Delta C} \right), \quad (36)$$

---

The above equation can be written as:

$$\Delta\rho = -\beta_C\rho\Delta p. \quad (37)$$

In free convection flow, thermal and mass compressibility have constant temperature and concentration. Thus, the effect of  $K_T$  and  $K_T$  can be ignored in equation (29); we can write:

$$d\rho = -\beta_T\rho dT - \beta_C\rho dC, \quad (38)$$

which can be expressed as:

$$\rho_\infty - \rho = -\beta_T\rho(T_\infty - T) - \beta_C\rho(C_\infty - C). \quad (39)$$

The above equation can be written as:

$$\rho_\infty - \rho = \beta_T\rho(T - T_\infty) + \beta_C\rho(C - C_\infty). \quad (40)$$

Incorporating equation (40) in equation (26); we have:

$$\rho \frac{\partial u}{\partial t} = \mu \left(1 + \frac{1}{\beta}\right) \frac{\partial^2 u}{\partial y^2} - \eta \frac{\partial^4 u}{\partial y^4} + \mu \left(1 + \frac{1}{\beta}\right) \frac{\phi}{k_1} u + \beta_T \rho \vec{g}(T - T_\infty) + \beta_C \rho \vec{g}(C - C_\infty) \quad (41)$$
